# Supplementary material for: “Pure” hepatoid tumors of the pancreas harboring CTNNB1 somatic mutations: a new entity among solid pseudopapillary neoplasms
Source: PubMed Central journal article supplement (PMC9226109; doi:10.1007/s00428-022-03317-4), 2022-03-31
Supplement: 428_2022_3317_MOESM1_ESM.pdf [file 428_2022_3317_MOESM1_ESM.pdf]

**Supplementary Table 1: Targeted genes in the CORE sequencing assay****Genes covered for all coding exons**

|       |         |          |        |        |        |        |        |          |          |          |
|-------|---------|----------|--------|--------|--------|--------|--------|----------|----------|----------|
| AKT1  | AKT2    | AKT3     | ALK    | AMER1  | APC    | APLNR  | AR     | ARAF     | ARID1A   | ARID1B   |
| ARID2 | ASXL1   | ATM      | ATR    | ATRX   | B2M    | BAP1   | BLM    | BRAF     | BRCA1    | BRCA2    |
| CBL   | CCND1   | CCND3    | CD274  | CD58   | CDK12  | CDK4   | CDKN1A | CDKN1B   | CDKN2A   | CDKN2B   |
| CHEK2 | CIITA   | CREBBP   | CTCF   | CTNNB1 | DAXX   | DICER1 | DNMT3A | EGFR     | EP300    | EPHA3    |
| ERBB2 | ERBB3   | ERBB4    | ERG    | ESR1   | ETV6   | EZH2   | FAS    | FBXW7    | FGFR1    | FGFR2    |
| FGFR3 | FGFR4   | GATA3    | GNA11  | GNAQ   | GNAS   | H3F3A  | H3F3B  | HIST1H3B | HIST1H3C | HIST2H3C |
| HLA-A | HLA-B   | HLA-C    | HNF1A  | HRAS   | IDH1   | IDH2   | JAK1   | JAK2     | JAK3     | JUN      |
| KDR   | KIT     | KLF4     | KMT2A  | KRAS   | MAP2K1 | MAP2K2 | MAP2K4 | MAP3K1   | MAPK1    | MAX      |
| MED12 | MEN1    | MET      | MLH1   | MSH2   | MSH6   | MTOR   | MUTYH  | MYB      | MYC      | MYCN     |
| NBN   | NF1     | NF2      | NFE2L2 | NOTCH1 | NOTCH2 | NOTCH3 | NOTCH4 | NPM1     | NRAS     | NTRK1    |
| PALB2 | PBRM1   | PDCD1LG2 | PDGFRA | PDGFRB | PHF6   | PIK3CA | PIK3CB | PIK3R1   | PMS2     | POLE     |
| POLQ  | PPP2R1A | PTCH1    | PTEN   | PTPN11 | RAC1   | RAD21  | RAD50  | RAF1     | RB1      | RET      |
| RHOA  | RNF43   | ROS1     | RPL5   | RUNX1  | SETBP1 | SETD2  | SF3B1  | SMAD4    | SMARCA4  | SMARCB1  |
| SMO   | SOCS1   | SPOP     | STAG1  | STAG2  | STAT3  | STAT5B | STK11  | SYK      | TGFB2    | TP53     |
| TSC1  | TSC2    | U2AF1    | VHL    | WT1    |        |        |        |          |          |          |

**Cancer CORE: genes covered for copy number alterations**

|        |        |        |        |        |       |       |          |        |        |        |
|--------|--------|--------|--------|--------|-------|-------|----------|--------|--------|--------|
| AKT1   | AKT2   | AKT3   | ALK    | APC    | APLNR | AR    | AURKA    | AXL    | B2M    | BCL2   |
| BRAF   | BRCA1  | BRCA2  | CCND1  | CCND2  | CCND3 | CCNE1 | CD274    | CDK2   | CDK4   | CDK6   |
| CDKN1B | CDKN2A | CDKN2B | CIITA  | CTNNB1 | EGFR  | EPHA3 | ERBB2    | ERG    | ESR1   | ETV6   |
| EZH2   | FGF19  | FGFR1  | FGFR2  | FGFR3  | FGFR4 | HGF   | HLA-A    | HLA-B  | HLA-C  | IGF1R  |
| JAK1   | JAK2   | JAK3   | JUN    | KIT    | KRAS  | MCL1  | MDM2     | MET    | MLH1   | MYC    |
| NFE2L2 | NOTCH1 | NOTCH2 | NOTCH3 | NOTCH4 | NTRK1 | PALB2 | PDCD1LG2 | PDGFRA | PDGFRB | PIK3CB |
| PTEN   | RAF1   | RB1    | RET    | SMAD4  | SOCS1 | SRC   | STAT3    | SYK    | TERT   | TP53   |
| TSC1   | TSC2   | VHL    | YAP1   |        |       |       |          |        |        |        |

**Cancer CORE: genes with full-gene footprint for structural variations**

|       |      |       |       |        |        |       |       |       |      |     |
|-------|------|-------|-------|--------|--------|-------|-------|-------|------|-----|
| APLNR | B2M  | BRCA1 | BRCA2 | CDKN2A | CDKN2B | HLA-A | HLA-B | HLA-C | PTEN | RB1 |
| TP53  | TSC1 |       |       |        |        |       |       |       |      |     |

**Cancer CORE: genes covered for fusions detection**

|     |      |      |       |       |       |       |      |     |      |      |
|-----|------|------|-------|-------|-------|-------|------|-----|------|------|
| ALK | BRAF | EGFR | ETV6* | FGFR2 | FGFR3 | NTRK1 | RAF1 | RET | ROS1 | TERT |
|-----|------|------|-------|-------|-------|-------|------|-----|------|------|

\*ETV6 reports NTRK3 fusions
